# Supplementary material
Source: PubMed Central journal article supplement (PMC2891490)
Supplement: supp_hfq056_hfq056supp1.pdf [file supp_hfq056_hfq056supp1.pdf]

## Online Appendix 1. Example search strategy

MEDLINE DIALOG 1950-WEEK 1 2008

1. search: myocardial-ischemia#.de.
2. search: myocard\$4 near (ischaemi\$2 or ischemi\$2)
3. search: (ischaemi\$2 or ischemi\$2) near heart
4. search: coronary-artery-bypass#.de.
5. search: coronary.ti,ab.
6. search: coronary-disease#.de.
7. search: myocardial-revascularization#.de.
8. search: myocardial-infarction#.de.
9. search: myocard\$5 near infarct\$5
10. search: heart near infarct\$5
11. search: angina-pectoris#.de.
12. search: angina.ti,ab.
13. search: heart-failure-congestive#.de.
14. search: heart near failure
15. search: 1 or 2 or 3 or 4 or 5 or 6 or 7 or 8 or 9 or 10 or 11 or 12 or 13 or 14
16. search: heart-diseases#.de.
17. search: (heart near disease\$2).ti,ab.
18. search: myocard\$5.ti,ab.
19. search: cardiac\$2.ti,ab.
20. search: cabg
21. search: ptca
22. search: stent\$4 and (heart or cardiac\$4)
23. search: heart-bypass-left#.de. or heart-bypass-right#.de.
24. search: 16 or 17 or 18 or 19 or 20 or 21 or 22 or 23
25. search: rehabilitation-centers.de.
26. search: exercise-therapy#.de.
27. search: rehabilitation.w..de.
28. search: sports#.w..de.
29. search: exertion#.w..de.
30. search: exercise#.w..de.
31. search: rehabilitat\$5.ti,ab.

32. search: physical\$4 near (fit or fitness or train\$5 or therap\$5 or activit\$5)
  33. search: train\$5 near (strength\$3 or aerobic or exercis\$4)
  34. search: (exercise\$4 or fitness) near (treatment or intervent\$4 or program\$2 or therapy)
  35. search: patient-education#.de.
  36. search: patient\$2 near educat\$4
  37. search: (lifestyle or life-style) near (intervent\$5 or program\$2 or treatment\$2)
  38. search: self-care.de.
  39. search: self near (manage\$5 or care or motivat\$5)
  40. search: ambulatory-care.de.
  41. search: psychotherapy#.w..de.
  42. search: psychotherap\$2.ti,ab.
  43. search: psycholog\$5 near intervent\$5
  44. search: relax\$6.ti,ab.
- home-based versus centre-based cardiac rehabilitation

48 / 56

45. search: relaxation-techniques#.de. or mind-body-and-relaxation-techniques#.de.
46. search: counseling#.w..de.
47. search: (counselling or counseling).ti,ab.
48. search: cognitive-therapy#.de.
49. search: behavior-therapy#.de.
50. search: (behavior\$4 or behaviour\$4) near (modify or modificat\$4 or therap\$2 or change)
51. search: stress-psychological#.de.
52. search: stress near management
53. search: cognitive near therap\$2
54. search: meditat\$4
55. search: meditation#.w..de.
56. search: anxiety#.w..de.
57. search: manage\$5 near (anxiety or depres\$5)
58. search: cbt.ti,ab.
59. search: hypnotherap\$5
60. search: goal near setting
61. search: goal\$2 near setting
62. search: psycho-educat\$5 or psychoeducat\$5
63. search: motivat\$5 near (intervention or interv\$3)

64. search: psychopathology#.w..de.
65. search: psychopathol\$4.ti,ab.
66. search: psychosocial\$4.ti,ab.
67. search: distress\$4.ti,ab.
68. search: health-education#.de.
69. search: health near education
70. search: heart adj manual
71. search: autogenic-training#.de.
72. search: autogenic\$5.ti.ab.
73. search: 25 or 26 or 27 or 28 or 29 or 30 or 31 or 32 or 33 or 34 or 35 or 36 or 37 or 38
74. search: 39 or 40 or 41 or 42 or 43 or 44 or 45 or 46 or 47 or 48 or 49 or 50 or 51 or 52 or 53 or 54 or 55 or 56 or 57 or 58 or 59 or 60 or 61 or 62 or 63 or 64 or 65 or 66 or 67 or 68 or 69 or 70 or 71 or 72
75. search: 15 or 24
76. search: 73 or 74
77. search: 75 and 76
78. search: randomized-controlled-trials#.de.
79. search: pt=randomized-controlled-trial
80. search: pt=controlled-clinical-trial
81. search: controlled-clinical-trials#.de.
82. search: random-allocation#.de.
83. search: double-blind-method#.de.
84. search: single-blind-method#.de.
85. search: (random\$ or placebo\$).ti,ab.
86. search: ((singl\$3 or doubl\$3 or tripl\$3 or trebl\$3) near (blind\$3 or mask\$3)).ti,ab.
87. search: research-design#.de.
88. search: pt=clinical-trial#
89. search: clinical-trials#.de.
90. search: (clinic\$3 adj trial\$2).ti,ab.
91. search: 77 and 90
92. search: (animals not humans).sh.
93. search: 91 not 92
94. search: limit 93 to 2001-date
