# Supplementary material
Source: PubMed Central journal article supplement (PMC2891490)
Supplement: supp_hfq056_hfq056supp2.pdf [file supp_hfq056_hfq056supp2.pdf]

**e-Table 1. HRQoL results**

| Trial<br>First author<br>(year) | Follow up | HRQoL<br>measure                      | Outcome values at follow up                 | Between-group difference |
|---------------------------------|-----------|---------------------------------------|---------------------------------------------|--------------------------|
|                                 |           |                                       | Mean (Standard deviation)                   |                          |
|                                 |           |                                       | Control vs. Exercise, between group P-value |                          |
| Austin (2005)<br>and (2008)     | 6-months  | MLWHF                                 |                                             |                          |
|                                 |           | Physical                              | 20.4 (12.2) vs. 12.6 (9.7) P < 0.0001*      | Exercise > Control       |
|                                 |           | Emotional                             | 8.0 (7.1) vs. 4.4 (10.4) P<0.01*            | Exercise > Control       |
|                                 |           | Total                                 | 36.9 (24.0) vs. 22.9 (17.8) P <0.001*       | Exercise > Control       |
|                                 |           | EQ-5D                                 | 0.58 (0.19) vs. 0.70 (0.16) P < 0.0001*     | Exercise > Control       |
|                                 | 5-years   | MLWHF                                 |                                             |                          |
|                                 |           | Physical                              | 19.3 (23.5) vs. 18.3 (11.2) P = 0.66*       | Exercise = Control       |
|                                 |           | Emotional                             | 7.6 (7.1) vs. 7.4 (6.5) P=0.88*             | Exercise = Control       |
| Total                           |           | 37.1 (24.9) vs. 35.5 (21.7) P = 0.72* | Exercise = Control                          |                          |
|                                 | EQ-5D     | 0.58 (0.22) vs. 0.64 (0.19) P = 0.12* | Exercise = Control                          |                          |

|                      |            |           |                                                                    |                    |
|----------------------|------------|-----------|--------------------------------------------------------------------|--------------------|
| Bellardinelli (1999) | 15-months  | MLWHF     | 52 (20) vs. 39 (20) P<0.001                                        | Exercise > Control |
|                      | 29-months  | Total     | 54 (22) vs. 44 (21) P <0.001                                       | Exercise > Control |
| Dracup (2007)        | 6-months   | MLWHF     |                                                                    |                    |
|                      |            | Physical  | 19.4 (11.5) vs. 16.1 (10.0) P = 0.04*                              | Exercise > Control |
|                      |            | Emotional | 10.5 (7.4) vs. 7.8 (6.6) P =0.01*                                  | Exercise > Control |
|                      |            | Total     | 43.2 (26.5) vs. 35.7 (23.7) P = 0.05                               | Exercise > Control |
| Gottlieb (1999)      | 6-months   | MLWHF     |                                                                    |                    |
|                      |            | Total     | NR (NR) vs. 22 (20) NR                                             | NR                 |
|                      |            | MOS       |                                                                    |                    |
|                      |            | PF        | NR (NR) vs. 68 (28) NR                                             | NR                 |
|                      |            | RL        | NR (NR) vs. 50 (42) NR                                             | NR                 |
|                      |            | GH        | NR (NR) vs. 361 (224) NR                                           | NR                 |
| HF-ACTION (2009)     | 3-months   | KCCQ      | 5.21 (95%CI 4.42 to 6.00) vs. 3.28 (2.48 to 4.09) P < 0.001        | Exercise > control |
| Klocek (2005)        | 6.5 months | PGWB      |                                                                    | Exercise > Control |
|                      |            | Total     | 99.0 vs. 109.0 (training grp A) vs. 71.7 (training grp B) P < 0.01 |                    |
| Koukouvou 2004       | 6 months   | MLWHF     |                                                                    | Exercise > Control |
|                      |            |           |                                                                    | Exercise > Control |

|                     |             |              |                                      |                    |
|---------------------|-------------|--------------|--------------------------------------|--------------------|
|                     |             | Total        | 34.1 (13.0) vs. 45.1 (9.9) P =0.05*  |                    |
|                     |             | Spritzer QLI |                                      |                    |
|                     |             | Total        | 7.1 (1.1) vs. 9.1 (1.1) P< 0.0001*   |                    |
| McKelvie (2002)     | 12-months   | MLWHF        |                                      |                    |
|                     |             | Total        | -3.3 (13.9) vs. -3.4 (18.1) P = 0.98 | Exercise = Control |
| Passino (2006)      | 9.75 months | MLWHF        | 53 (32) vs. 32 (26.5) P < 0.0001*    | Exercise > Control |
| Willenheimer (2001) | 10-months   | PGAQoL       | 0 (1) 0.7 (0.9) P =0.023             | Exercise > Control |

\*P-values calculated by authors of this paper

QLI: quality of life index; MLWHF: Minnesota Living with Heart Failure questionnaire; PGAQoL: Patient's Global Assessment of Quality of life; PGWB: Psychological general Wellbeing Index; KCCQ: Kansas City Cardiomyopathy Questionnaire; NR: not reported.

Exercise = Control: no statistically significant difference (P > 0.05) in HRQoL between exercise & control groups at follow up

Exercise > Control: statistically significant (P <=0.05) higher HRQoL in exercise compared to control group at follow up

Exercise < Control: statistically significant (P <=0.05) lower HRQoL in exercise versus control group at follow up
