# Supplementary material
Source: PubMed Central journal article supplement (PMC2891490)

**e-Figure 1a.** Meta-analysis – All hospitalizations <12-months follow up

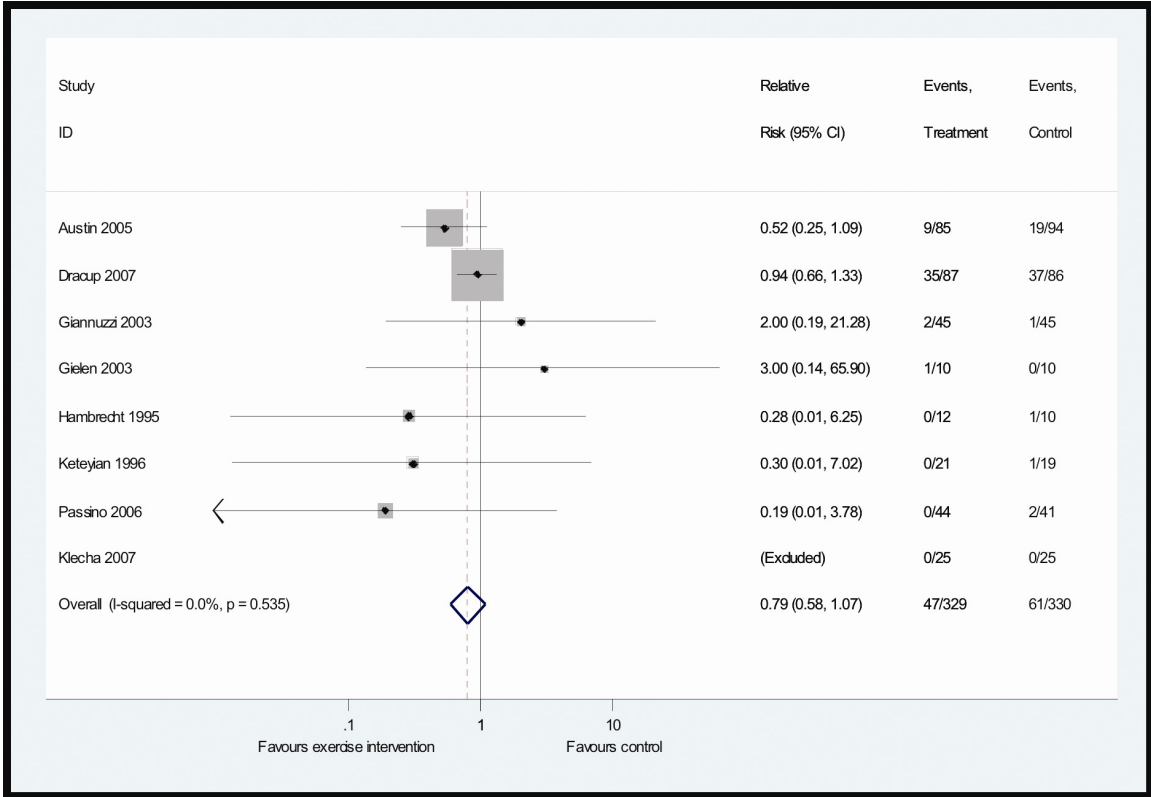

**e-Figure 1b.** Meta-analysis – All hospitalizations >12-months follow up

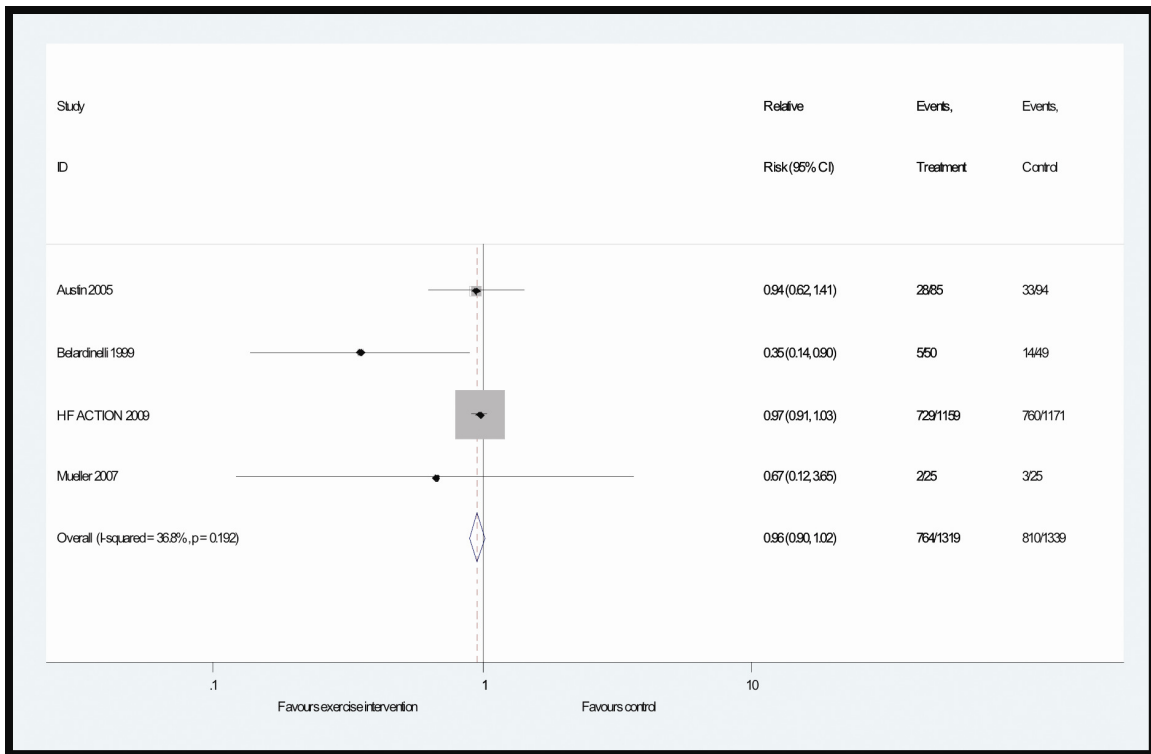

**e-Figure 2.** Meta-analysis – HRQoL: MLWHF

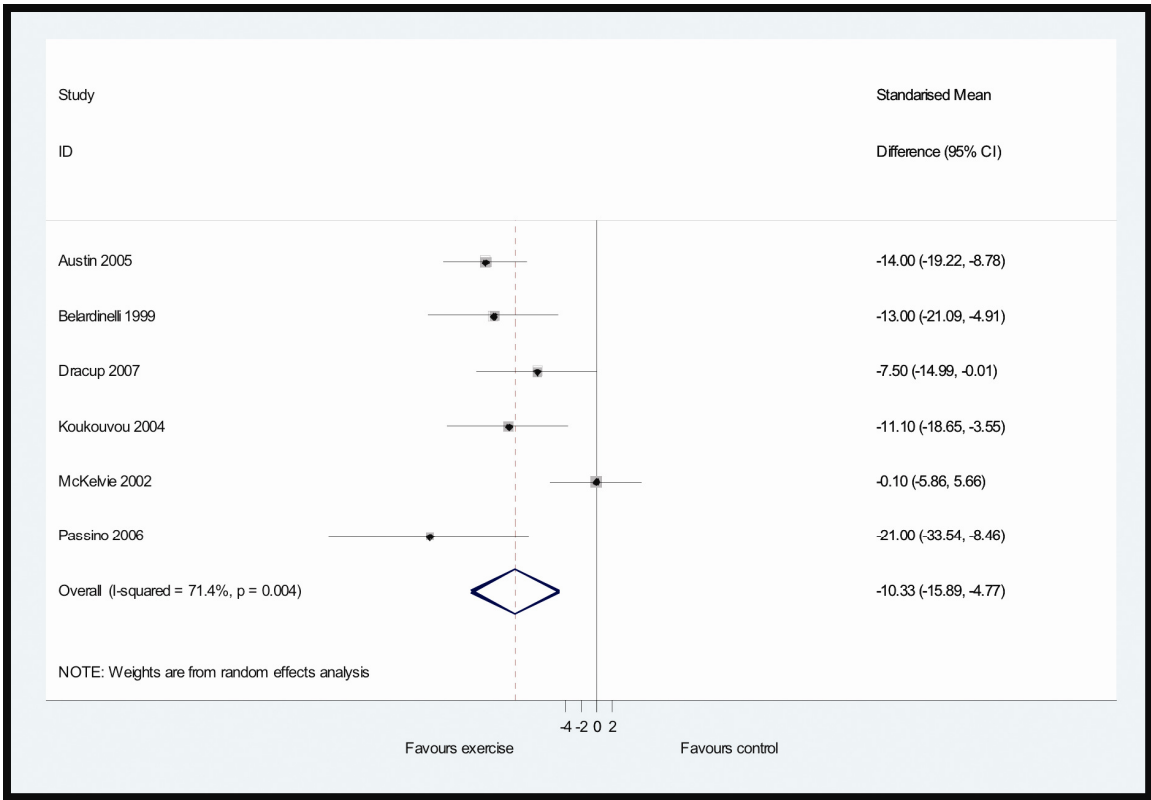

**e-Figure 3.** Meta-analysis – HRQoL: all scales

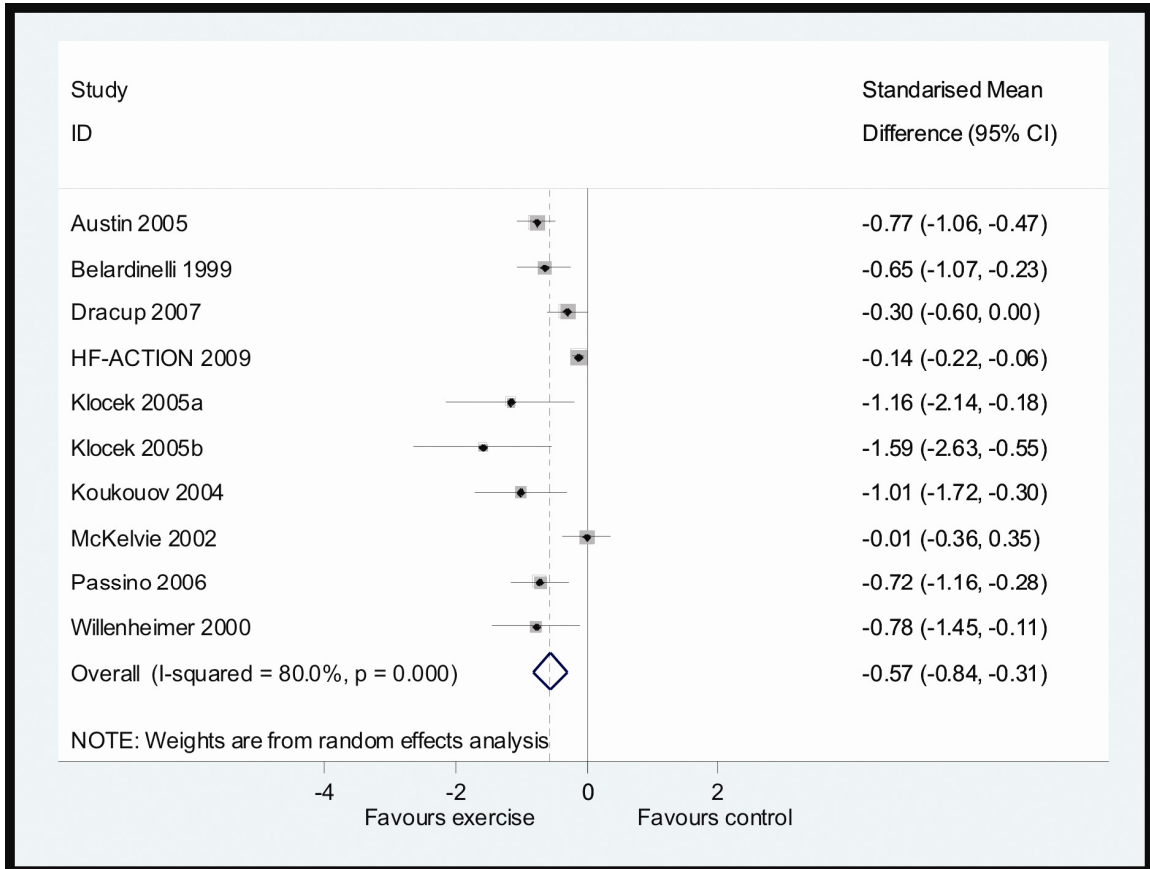

e-**Figure 4.** – Funnel plot – all cause mortality < 12 months

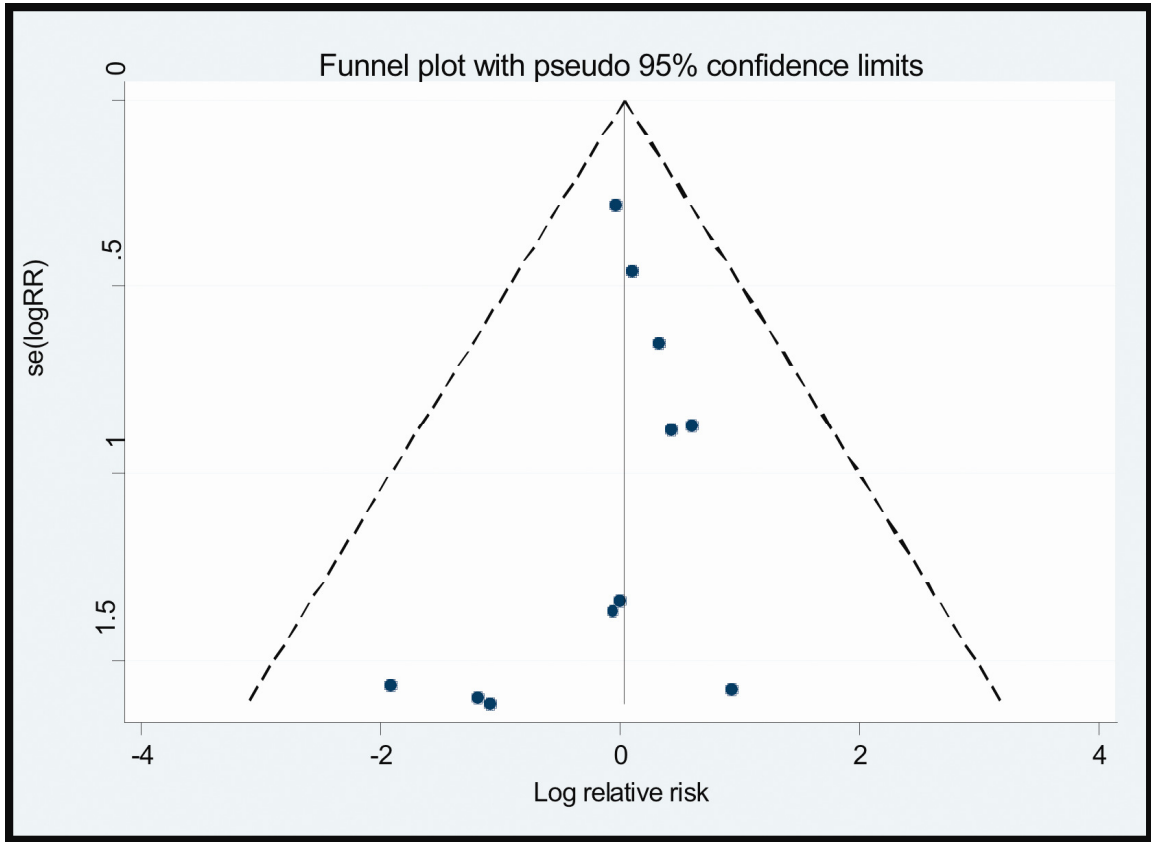

**e-Figure 5.** – Funnel plot – all hospitalizations < 12 months

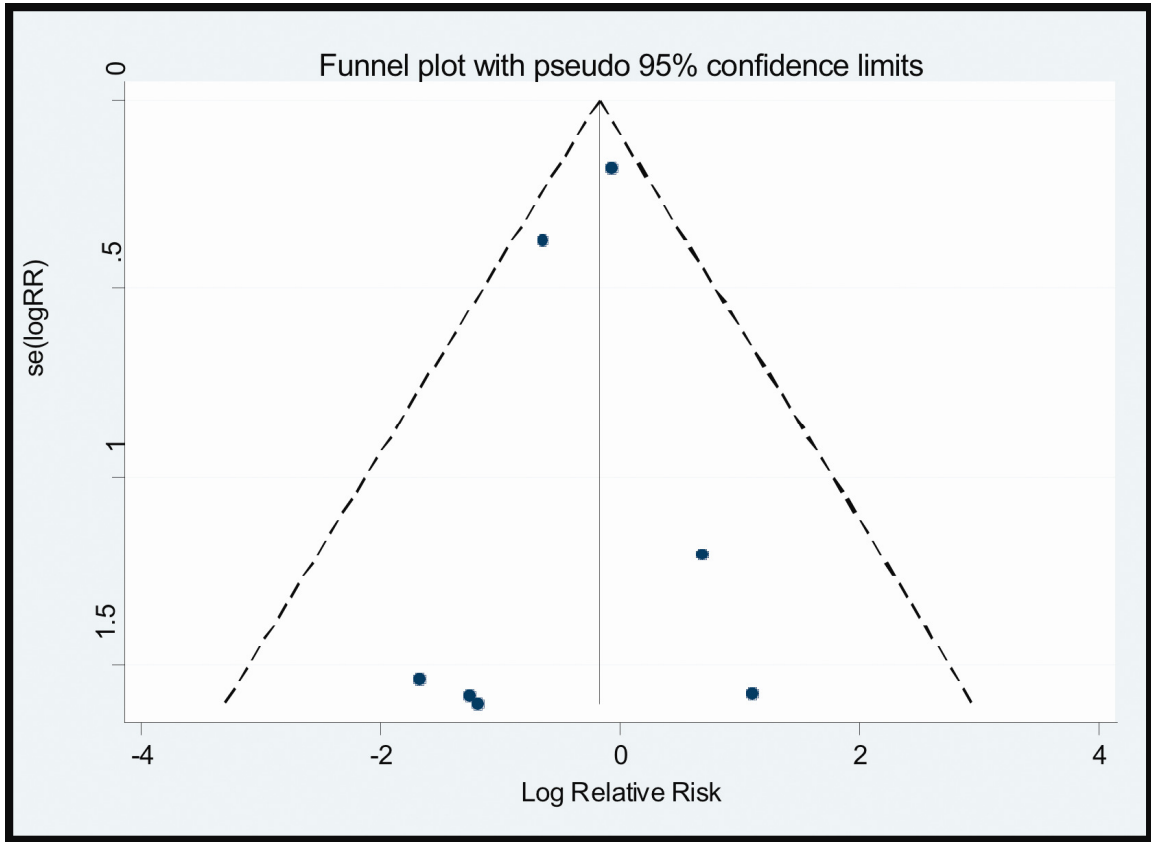

**e-Figure 6.** – Funnel plot – HRQoL all scales

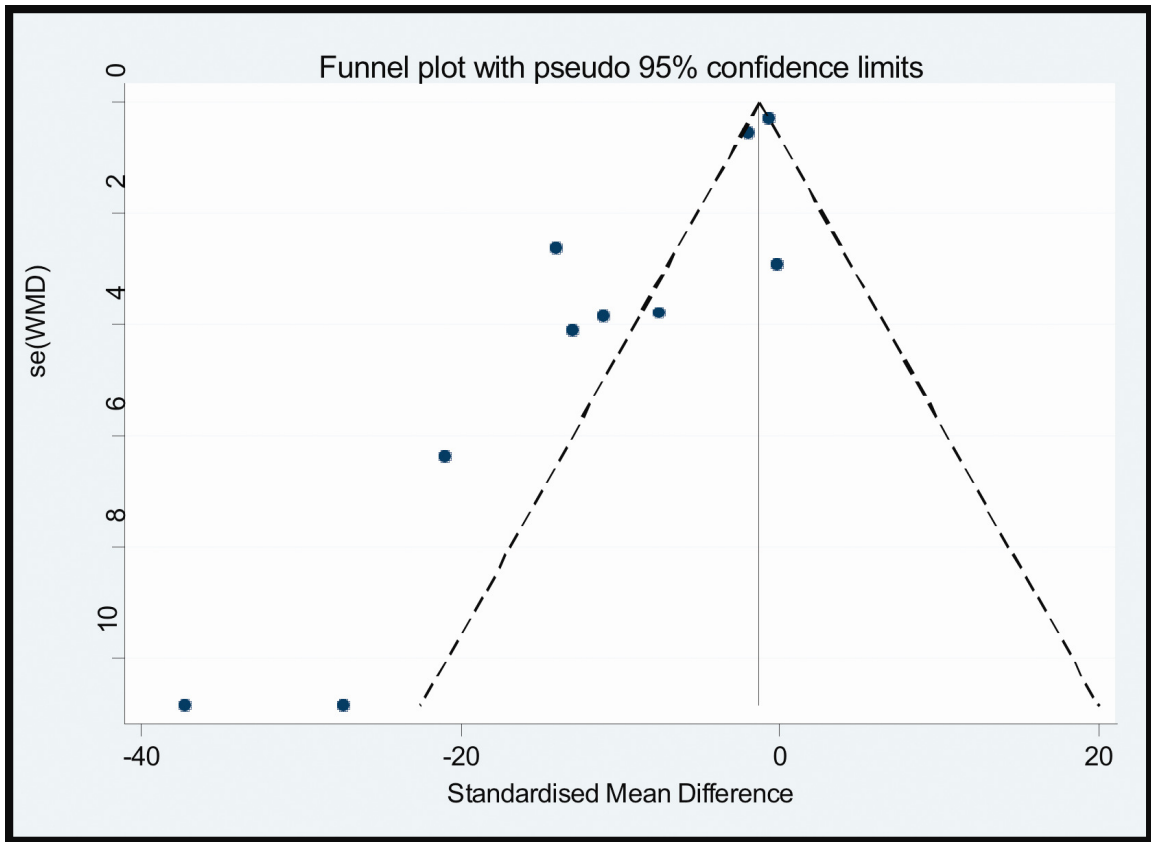

Supplement: supp_hfq056_hfq056supp3.pdf [file supp_hfq056_hfq056supp3.pdf]
